# Supplementary material
Source: publisher figshare collection journal article supplement (https://frontiersin.figshare.com/ndownloader/files/12808355)
Supplement: Supplementary file [file 12808355]

## Supplementary Material

# Transcriptomic, functional and network analyses reveal novel genes involved in the interaction between *Caenorhabditis elegans* and *Stenotrophomonas maltophilia*

Corin V. White, Michael A. Herman\*

\* Correspondence: Michael A. Herman: mherman5@unl.edu

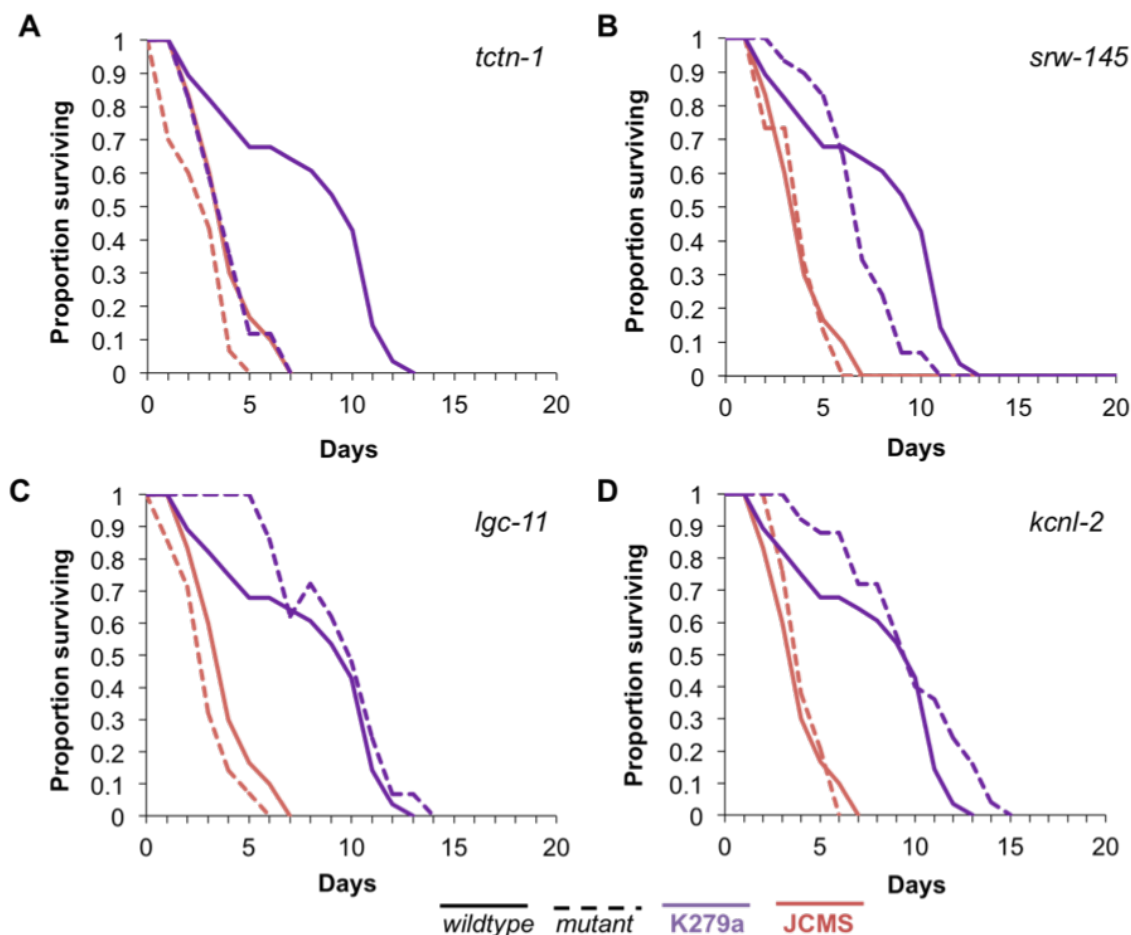

**Figure S2: Survival of wild-type nematodes and mutants (non-connected differentially expressed genes) on *S. maltophilia* JCMS or K279a.**

Survival of wild-type nematodes (solid lines) and select mutants in genes with similar expression representative patterns that are not part of the gene network (dashed lines) exposed to *S. maltophilia* JCMS (red) or K279a (purple). (A) *tctn-1(ok3021)* (B) *srw-145(ok495)* (C) *lgc-11(tm627)* (D) *kcnl-2(ok2818)*. Gene mutants shown were those that showed significant changes in survival on JCMS or K279a (Table S6). Results plotted are the proportion of surviving worms using Kaplan-Meier

estimates for replicate samples (starting with 10 nematodes per replicate) of the same nematode population. p values from the Cox proportional hazards models and sample sizes of each population are included in Table S6. Mutants of *lgc-11* and *tctn-1* were short lived on *S. maltophilia* JCMS. *srw-145* and *tctn-1* mutants were susceptible while, *kcnl-2* mutants were marginally significantly long lived on *S. maltophilia* K279a. Survival on *E. coli* OP50 was not conducted for all mutants and, thus, these data were not included in this figure.
